# Supplementary material for: An optical and electrical study of full thermally activated delayed fluorescent white organic light-emitting diodes
Source: PubMed Central journal article supplement (PMC5524785; doi:10.1038/s41598-017-06568-3), 2017-07-24
Supplement: 41598_2017_6568_MOESM1_ESM.pdf [file 41598_2017_6568_MOESM1_ESM.pdf]

# Supplementary Information

## **An optical and electrical study of full thermally activated delayed fluorescent white organic light-emitting diodes**

Daniel de Sa Pereira<sup>1\*</sup>, Paloma L. dos Santos<sup>1</sup>, Jonathan S. Ward<sup>2</sup>, Przemyslaw Data<sup>1,3,4</sup>, Masato Okazaki<sup>5</sup>, Youhei Takeda<sup>5</sup>, Satoshi Minakata<sup>5</sup>, Martin R. Bryce<sup>2</sup> and Andrew P. Monkman<sup>1</sup>

<sup>1</sup> *Physics Department, Durham University, South Road, Durham DH1 3LE, United Kingdom.*

<sup>2</sup> *Department of Chemistry, Durham University, South Road, Durham DH1 3LE, United Kingdom.*

<sup>3</sup> *Centre of Polymer and Carbon Materials, Polish Academy of Science, M. Curie-Sklodowskiej 34, 41-819 Zabrze, Poland.*

<sup>4</sup> *Faculty of Chemistry, Silesian University of Technology, M. Strzody 9, 44-100 Gliwice, Poland.*

<sup>5</sup> *Department of Applied Chemistry Graduate School of Engineering Osaka University, Yamadaoka 2-1, Suita Osaka 565-0871, Japan.*

[daniel.a.pereira@durham.ac.uk](mailto:daniel.a.pereira@durham.ac.uk)

[p.l.dos-santos@durham.ac.uk](mailto:p.l.dos-santos@durham.ac.uk)

[jonathan.ward@durham.ac.uk](mailto:jonathan.ward@durham.ac.uk)

[przemyslaw.data@durham.ac.uk](mailto:przemyslaw.data@durham.ac.uk)

[m-okazaki@chem.eng.osaka-u.ac.jp](mailto:m-okazaki@chem.eng.osaka-u.ac.jp)

[takeda@chem.eng.osaka-u.ac.jp](mailto:takeda@chem.eng.osaka-u.ac.jp)

[minakata@chem.eng.osaka-u.ac.jp](mailto:minakata@chem.eng.osaka-u.ac.jp)

[m.r.bryce@durham.ac.uk](mailto:m.r.bryce@durham.ac.uk)

[a.p.monkman@durham.ac.uk](mailto:a.p.monkman@durham.ac.uk)

### **Corresponding Author:**

Daniel A. de Sa Pereira

E-mail: [daniel.a.pereira@durham.ac.uk](mailto:daniel.a.pereira@durham.ac.uk)

Tel: +44 (0) 7764510766

**Table S1.** Electrical properties of the devices evaporated using the TADF emitters as single emitting devices. All data was collected from each article, available online.<sup>1-3</sup>

|                                                                                                       | Ref. | Host  | HOMO (eV) | LUMO (eV) | Triplet level (eV) <sup>1</sup> | $\lambda$ max (nm) | V <sub>ON</sub> (V) | L max (cd/m <sup>2</sup> ) | $\eta_{ext,max}$ (%) | $\eta_{L,max}$ (cd/A) | $\eta_P,max$ (lm/W) | $\eta_{ext}$ (%) <sup>2</sup> | $\eta_L$ (cd/A) <sup>2</sup> | $\eta_P$ (lm/W) <sup>2</sup> | L <sub>90%</sub> (cd/m <sup>2</sup> ) | CIE (x,y)   |
|-------------------------------------------------------------------------------------------------------|------|-------|-----------|-----------|---------------------------------|--------------------|---------------------|----------------------------|----------------------|-----------------------|---------------------|-------------------------------|------------------------------|------------------------------|---------------------------------------|-------------|
| 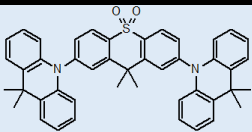<br><b>DDMA-TXO2</b> | 1    | DPEPO | -5.80     | -2.40     | 3.02                            | 465                | 3.5                 | >2.500                     | 22.4                 | NR                    | 17.2                | 18                            | NR                           | NR                           | 350                                   | (0.16,0.24) |
| <br><b>DPO-TXO2</b>  | 2    | DPEPO | -5.37     | -2.61     | 2.83                            | 520                | 3.5                 | >10.000                    | 13.5                 | 28.1                  | 35.7                | 11.5                          | 32                           | 20                           | 500                                   | (0.26,0.51) |
| <br><b>POZ-DBPHZ</b> | 3    | CBP   | -5.36     | -3.38     | 2.21                            | 600                | 3.7                 | >30.000                    | 16                   | >30                   | NR                  | 14                            | >30                          | NR                           | >2000                                 | NR          |

**Table S2.** Energy levels of both hosts used in this study.<sup>4,5</sup>

| HOST                                                                                              | HOMO (eV) | LUMO (eV) | Triplet level (eV) |
|---------------------------------------------------------------------------------------------------|-----------|-----------|--------------------|
| 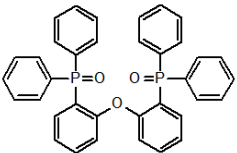<br><u>DPEPO</u> | -6.1      | -2.0      | 2.99 <sup>4</sup>  |
| <br><u>CBP</u>   | -6.0      | -2.9      | 2.56 <sup>5</sup>  |

**Table S3.** Molecular structures, the energy levels of each commercially available material and their function in the devices used in this study.

| Compound                                                                                          | Function | HOMO (eV) | LUMO (eV) | Triplet level (eV) |
|---------------------------------------------------------------------------------------------------|----------|-----------|-----------|--------------------|
| 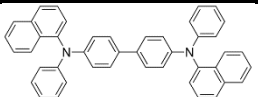<br><u>NPB</u>   | HTL      | -5.5      | -2.4      | 2.3                |
| <br><u>TPBi</u> | ETL      | -6.2      | -2.7      | 2.7                |

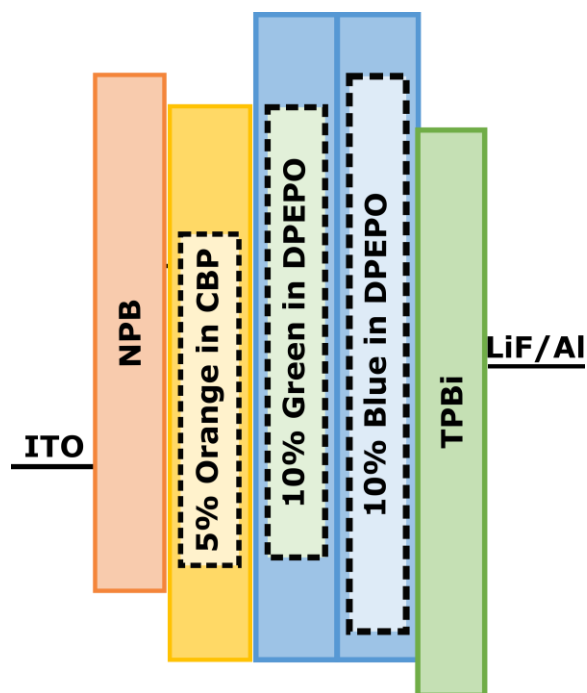

**Figure S1.** Energy Levels of the final white device.

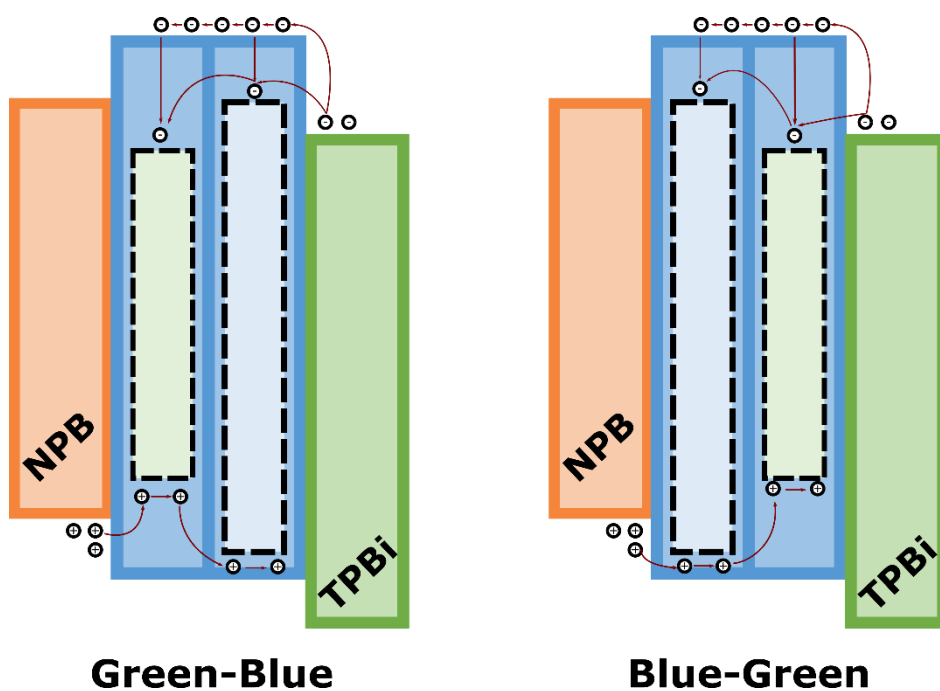

**Figure S2.** Direct hole injection mechanism in green-blue and blue-green structures. The direct injection from NPB to DPO-TXO2 is vastly enhanced by the no-energy gap in the green-blue structure.

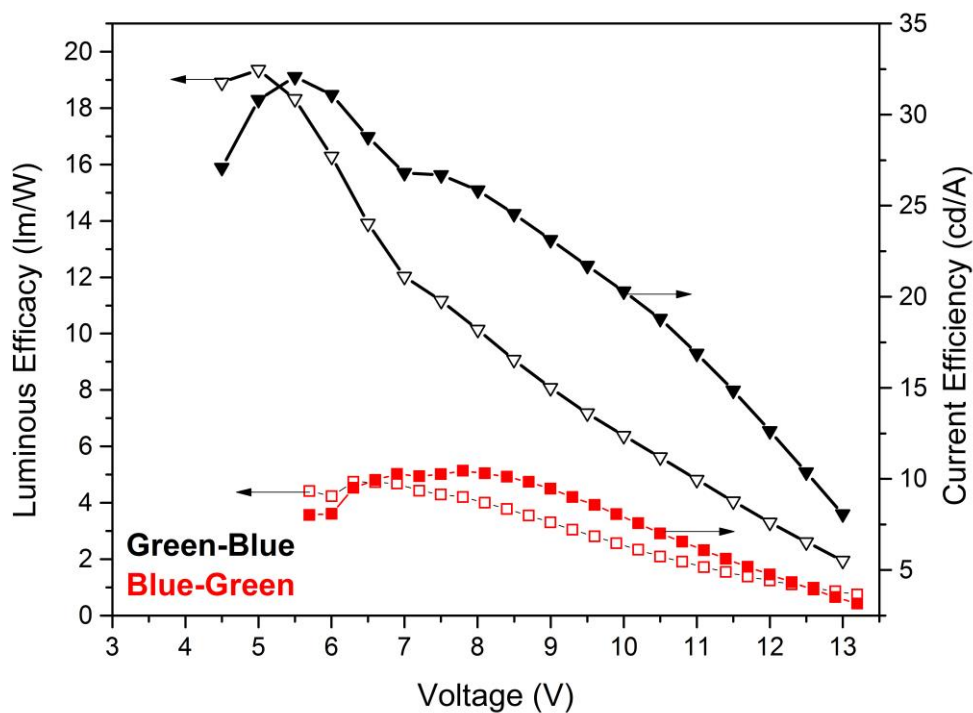

**Figure S3.** The luminous efficacy and the current efficiency of the devices green-blue and blue-green. Blue-green has much smaller efficiency values as the carrier balance in the structure pays a pivotal role in the overall operating mechanism.

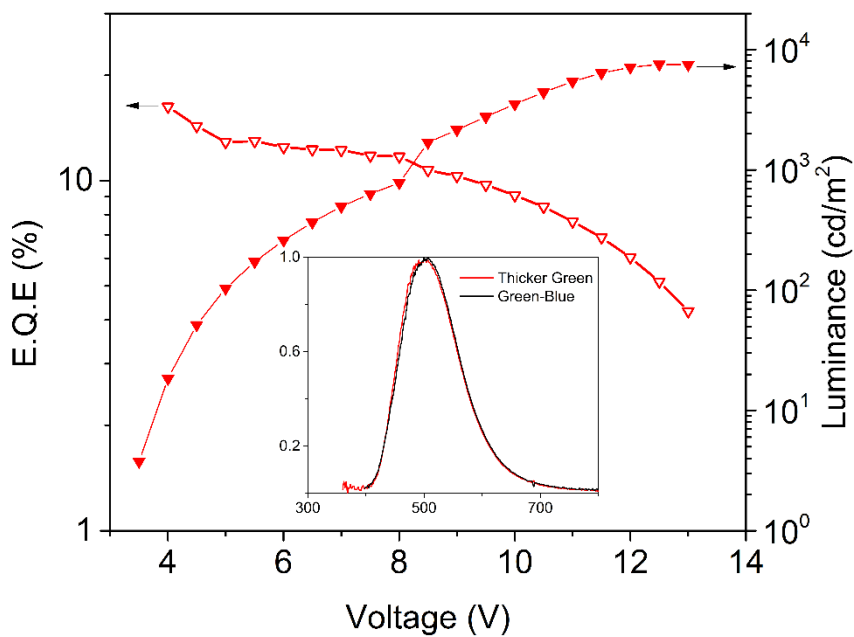

**Figure S4.** Electrical performance of the Green-blue device with thicker layer of green. The inset shows the normalized EL spectrum overlapped with the device from the first part of this study.

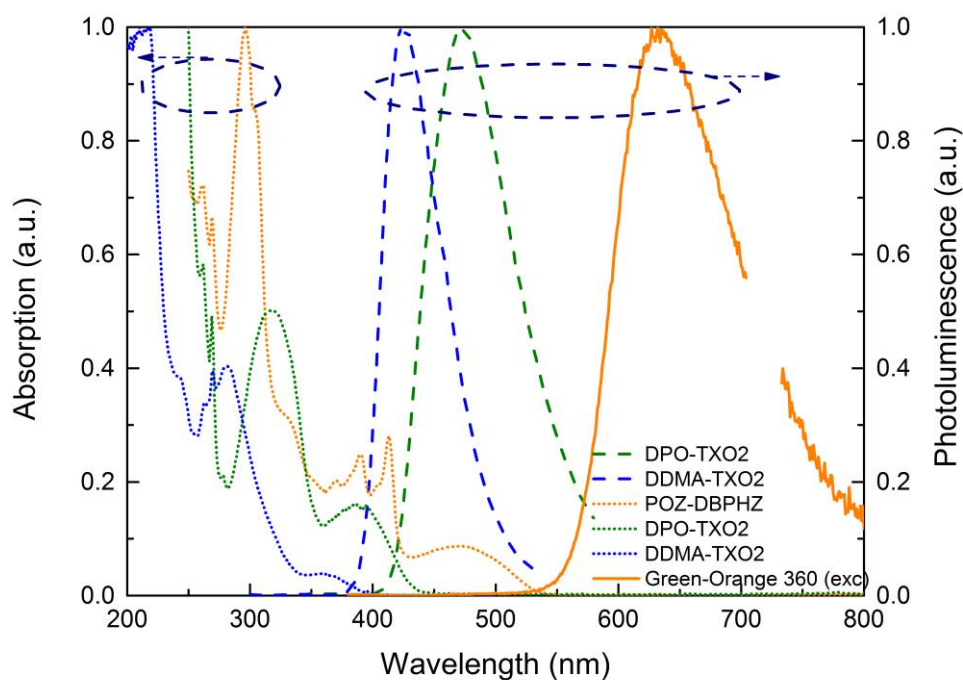

**Figure S5.** The absorption of POZ-DBPHZ, DPO-TXO2, DDMA-TXO2 together with the photoluminescence of DPO-TXO2 and DDMA-TXO2 and a blend of DPO-TXO2 and POZ-DBPHZ excited at 360 nm. It shows that, by exciting the blend, only emission from POZ-DBPHZ is seen, confirming the efficient energy transfer.

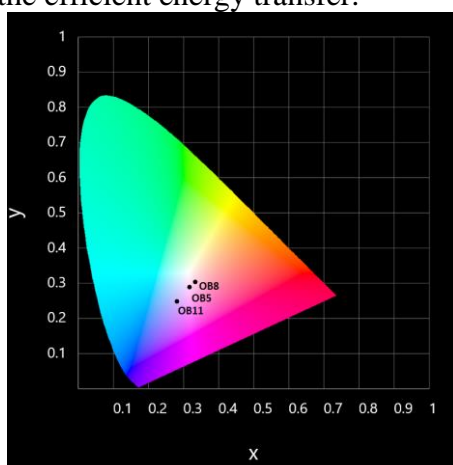

**Figure S6.** The CIE 1931 coordinates of devices OB5, 8 and 11 showing both the effects of the concentration of POZ-DBPHZ and the formation of aggregates in the device.

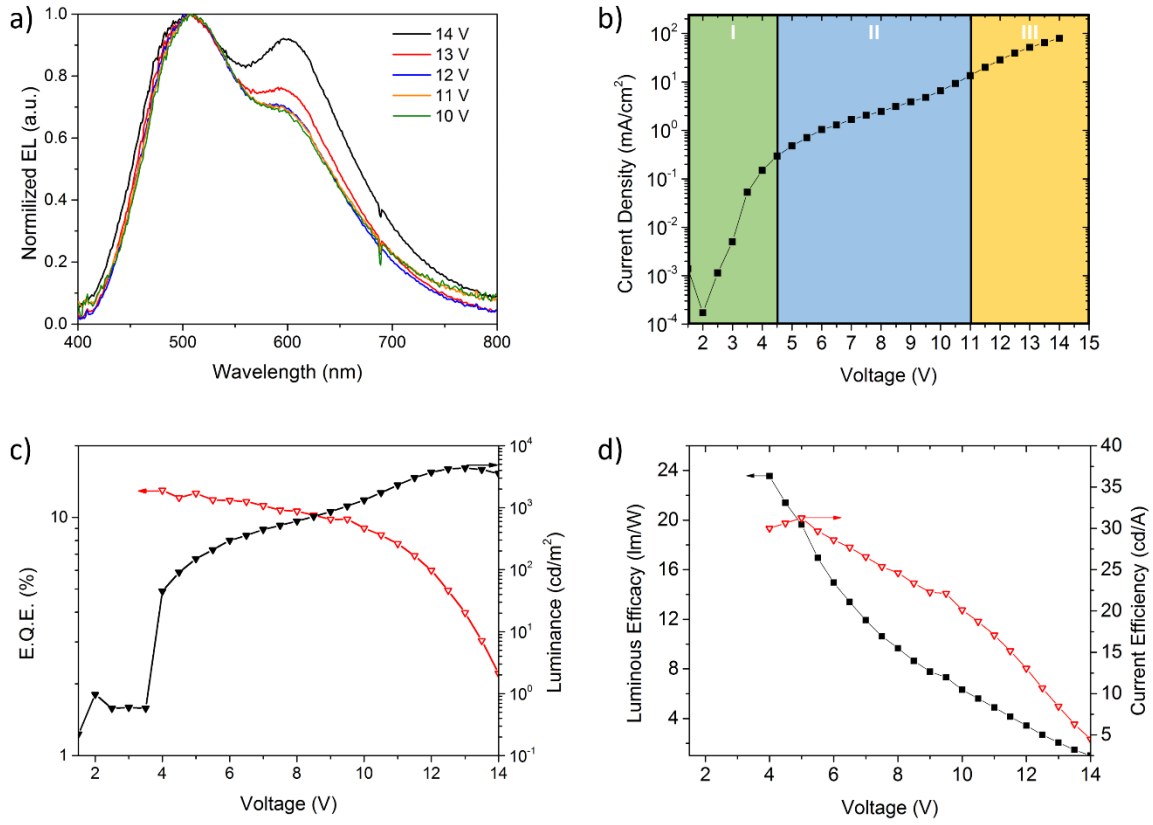

**Figure S7.** The electrical characterization of the orange green blue structure with thinner layers of DPEPO (7 nm). a) EL spectra at voltages from 10 to 14 V. b) Current density-voltage (JV) with three different current regimes: I the space charge limited current (SCLC); II and III the different carrier balance regimes. c)  $\eta_{ext}$  and luminance dependences with voltage. d) Luminous and current efficiencies of the device.

| $V_{ON}$<br>(V) | $L_{MAX}$<br>(cd/m <sup>2</sup> ) | $\eta_{ext, max}$<br>(%) | $\eta_{L, max}$<br>(cd/A) | $\eta_{P, max}$<br>(lm/W) | $\eta_{ext}^1$<br>(%) | $\eta_L^1$<br>(cd/A) | $\eta_P^1$<br>(lm/W) | $\eta_{ext}^2$<br>(%) | $\eta_L^2$<br>(cd/A) | $\eta_P^2$<br>(lm/W) |
|-----------------|-----------------------------------|--------------------------|---------------------------|---------------------------|-----------------------|----------------------|----------------------|-----------------------|----------------------|----------------------|
| 3.5             | 4372                              | 13.0                     | 31.2                      | 23.6                      | 12.4                  | 31.0                 | 20.5                 | 9.8                   | 22.2                 | 7.4                  |

<sup>1</sup> values taken at 100 cd/m<sup>2</sup>

<sup>2</sup> values taken at 1000 cd/m<sup>2</sup>

| Voltage (V) | CIEx | CIey | CCT (K) | CRI  |
|-------------|------|------|---------|------|
| 10          | 0.33 | 0.42 | 5462    | 79.8 |
| 12          | 0.33 | 0.42 | 5451    | 80.3 |
| 13          | 0.34 | 0.41 | 5282    | 83.1 |
| 14          | 0.36 | 0.40 | 4816    | 87.5 |

**Table S4.** Electrical and optical properties of the OGB devices.

|                |                                                                                     | CCT (K) | CRI   |
|----------------|-------------------------------------------------------------------------------------|---------|-------|
| Incandescent   | 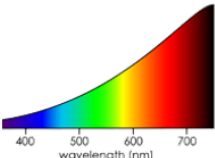   | ~2500   | 90-95 |
| Fluorescent    |    | ~4000   | 50-90 |
| Daylight       |    | 6000    | ~100  |
| Warm White LED |   | ~3000   | 70    |
| Cool White LED |  | ~7000   | 90    |

**Figure S8.** Different light sources and their corresponding Correlated Colour Temperatures and Colour Rendering Index as a means to compare with the devices obtained in this study.<sup>6</sup>

#### References

1. Dos Santos, P. L., Ward, J. S., Bryce, M. R. & Monkman, A. P. Using Guest-Host Interactions to Optimize the Efficiency of TADF OLEDs. *J. Phys. Chem. Lett.* **7**, 3341–3346 (2016).
2. Dos Santos, P. L. *et al.* Engineering the singlet-triplet energy splitting in a TADF molecule. *J. Mater. Chem. C* **4**, 3815–3824 (2016).
3. Data, P. *et al.* Dibenzo[a,j]phenazine-Cored Donor-Acceptor-Donor Compounds as Green-to-Red/NIR Thermally Activated Delayed Fluorescence Organic Light Emitters. *Angew. Chemie - Int. Ed.* **55**, 5739–5744 (2016).
4. Xu, H. *et al.* Application of chelate phosphine oxide ligand in EuIII complex with mezzo triplet energy level, highly efficient photoluminescent, and electroluminescent performances. *J. Phys. Chem. B* **110**, 3023–3029 (2006).



5. Adachi, C. *et al.* Endothermic energy transfer: A mechanism for generating very efficient high-energy phosphorescent emission in organic materials. *Appl. Phys. Lett.* **79**, 2082–2084 (2001).
6. Floroiu, V. A. The ABCs of truly energy efficient LED lighting. *linkedin* (2015). Available at: <https://www.linkedin.com/pulse/abcs-truly-energy-efficient-led-lighting-victor-adrian-floroiu>. (Accessed: 18th January 2017)
